# Supplementary material for: Bimetallic Pt–M (M = Fe, Co, Ni) nanobunches composed of ultrathin nanowires with strong synergy and rich surface defects for enhanced methanol oxidation electrocatalysis
Source: Royal Society of Chemistry journal article supplement (doi:10.1039/d4ce00265b), 2024-01-01
Supplement: d4ce00265b1.pdf [file d4ce00265b1.pdf]

**Bimetallic Pt-M (M = Fe, Co, Ni) nanobunches assembled by ultrathin nanowires with strong synergy and rich surface defects for enhanced methanol oxidation electrocatalysis**

Suwen Li<sup>a,b,1</sup>, Yu Zhang<sup>a,b,1</sup>, Yulan Liu<sup>a,b</sup>, Fangfei Lv<sup>a,b</sup>, Yiming Yan<sup>a,b</sup>, Baocang Liu<sup>c</sup>,  
Lili Huo<sup>a,b\*</sup>

<sup>a</sup>Chemical Engineering College, Inner Mongolia University of Technology, 49 Aimin Street, Hohhot 010051, P. R. China

<sup>b</sup>Key Laboratory of CO<sub>2</sub> Resource Utilization at Universities of Inner Mongolia Autonomous Region, 49 Aimin Street, Hohhot 010051, P. R. China

<sup>c</sup>Inner Mongolia Engineering and Technology Research Center for Catalytic Conversion and Utilization of Carbon Resource Molecules, School of Chemistry and Chemical Engineering, Inner Mongolia University, Hohhot 010021, P. R. China

---

\*Corresponding Author: L. Huo, Email: HuoLL101@imut.edu.cn

Table S1. Actual contents of elements in different catalysts as determined by EDS, XPS and ICP-MS results

| Catalysts          | Pt/M           |             |             |             |
|--------------------|----------------|-------------|-------------|-------------|
|                    | Designed ratio | EDS         | ICP         | XPS         |
| Pt <sub>3</sub> Co | 75.00/25.00    | 79.80/20.20 | 75.91/24.09 | 71.15/28.55 |
| PtCo               | 50.00/50.00    | 52.61/47.39 | 51.87/48.13 | 46.06/53.94 |
| PtCo <sub>3</sub>  | 25.00/75.00    | 21.67/78.33 | 23.62/76.38 | 20.15/79.85 |
| Pt <sub>3</sub> Ni | 75.00/25.00    | 77.16/22.84 | 72.49/27.51 | 70.33/29.67 |
| PtNi               | 50.00/50.00    | 37.86/62.84 | 37.37/62.63 | 34.37/65.63 |
| PtNi <sub>3</sub>  | 25.00/75.00    | 21.32/78.68 | 23.35/76.65 | 19.71/80.29 |
| Pt <sub>3</sub> Fe | 75.00/25.00    | 69.62/30.38 | 68.39/31.61 | 64.23/35.77 |
| PtFe               | 50.00/50.00    | 45.92/54.08 | 46.28/53.72 | 42.34/57.66 |
| PtFe <sub>3</sub>  | 25.00/75.00    | 29.47/70.53 | 28.66/71.34 | 31.98/68.02 |

**Table S2.** The MOR performance of the catalysts in acidic and alkaline media

| Catalyst                | Media                                | Onset potential/ V | $j_p/$<br>$\text{mA}\cdot\text{mg}^{-1}_{\text{Pt}}$ | $j_p/$<br>$\text{mA}\cdot\text{cm}^{-2}$ | ECSA<br>$(\text{m}^2\cdot\text{g}^{-1}_{\text{Pt}})$ |
|-------------------------|--------------------------------------|--------------------|------------------------------------------------------|------------------------------------------|------------------------------------------------------|
| <b>Pt<sub>3</sub>Co</b> | 0.5 M H <sub>2</sub> SO <sub>4</sub> | 0.489              | 173.83                                               | 33.33                                    | 22.42                                                |
|                         | 1.0 M KOH                            | 0.465              | 208.80                                               | 40.03                                    | -                                                    |
| <b>PtCo</b>             | 0.5 M H <sub>2</sub> SO <sub>4</sub> | 0.449              | 632.96                                               | 78.90                                    | 74.75                                                |
|                         | 1.0 M KOH                            | 0.375              | 589.85                                               | 67.50                                    | -                                                    |
| <b>PtCo<sub>3</sub></b> | 0.5 M H <sub>2</sub> SO <sub>4</sub> | 0.439              | 419.56                                               | 22.78                                    | 40.08                                                |
|                         | 1.0 M KOH                            | 0.485              | 120.09                                               | 6.52                                     | -                                                    |
| <b>Pt<sub>3</sub>Ni</b> | 0.5 M H <sub>2</sub> SO <sub>4</sub> | 0.469              | 223.57                                               | 42.37                                    | 24.15                                                |
|                         | 1.0 M KOH                            | 0.475              | 274.15                                               | 51.96                                    | -                                                    |
| <b>PtNi</b>             | 0.5 M H <sub>2</sub> SO <sub>4</sub> | 0.419              | 908.08                                               | 84.34                                    | 103.61                                               |
|                         | 1.0 M KOH                            | 0.395              | 1162.21                                              | 107.65                                   | -                                                    |
| <b>PtNi<sub>3</sub></b> | 0.5 M H <sub>2</sub> SO <sub>4</sub> | 0.519              | 13.15                                                | 0.7                                      | 1.59                                                 |
|                         | 1.0 M KOH                            | 0.565              | 6.31                                                 | 0.34                                     | -                                                    |
| <b>Pt<sub>3</sub>Fe</b> | 0.5 M H <sub>2</sub> SO <sub>4</sub> | 0.479              | 225.82                                               | 39.09                                    | 23.17                                                |
|                         | 1.0 M KOH                            | 0.455              | 348.92                                               | 60.39                                    | -                                                    |
| <b>PtFe</b>             | 0.5 M H <sub>2</sub> SO <sub>4</sub> | 0.469              | 502.60                                               | 57.35                                    | 46.87                                                |
|                         | 1.0 M KOH                            | 0.395              | 543.85                                               | 67.30                                    | -                                                    |
| <b>PtFe<sub>3</sub></b> | 0.5 M H <sub>2</sub> SO <sub>4</sub> | 0.539              | 140.74                                               | 12.15                                    | 18.78                                                |
|                         | 1.0 M KOH                            | 0.415              | 360.48                                               | 31.06                                    | -                                                    |
| <b>Pt/C</b>             | 0.5 M H <sub>2</sub> SO <sub>4</sub> | 0.499              | 255.90                                               | 34.48                                    | 44.45                                                |
|                         | 1.0 M KOH                            | 0.465              | 222.30                                               | 29.95                                    | -                                                    |

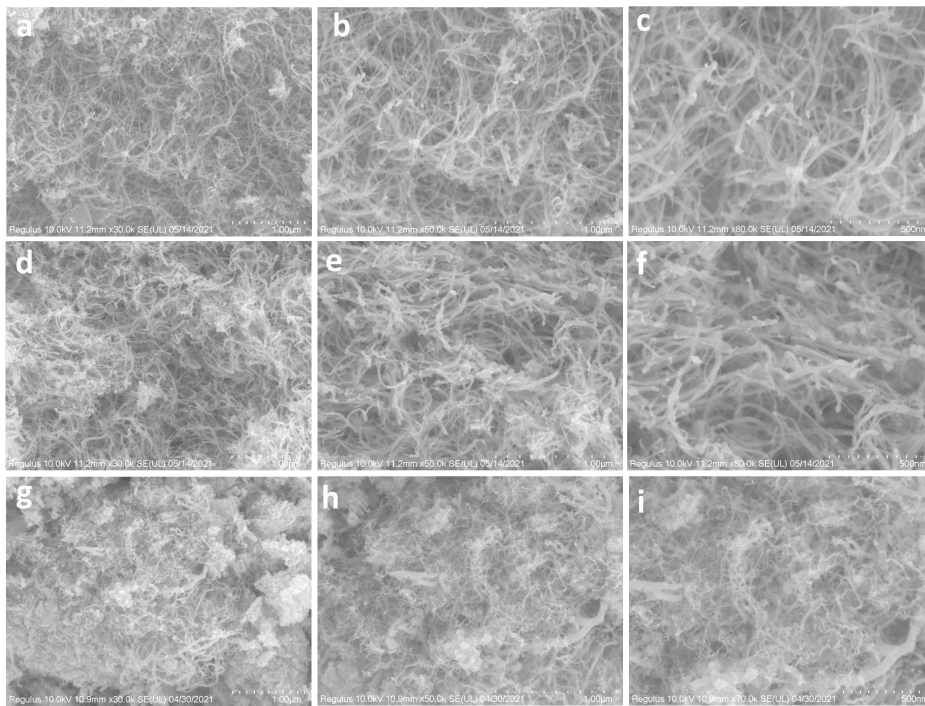

Figure S1. SEM images of Pt<sub>3</sub>Co (a-c), Pt<sub>3</sub>Fe (d-f) and Pt<sub>3</sub>Ni NBs.

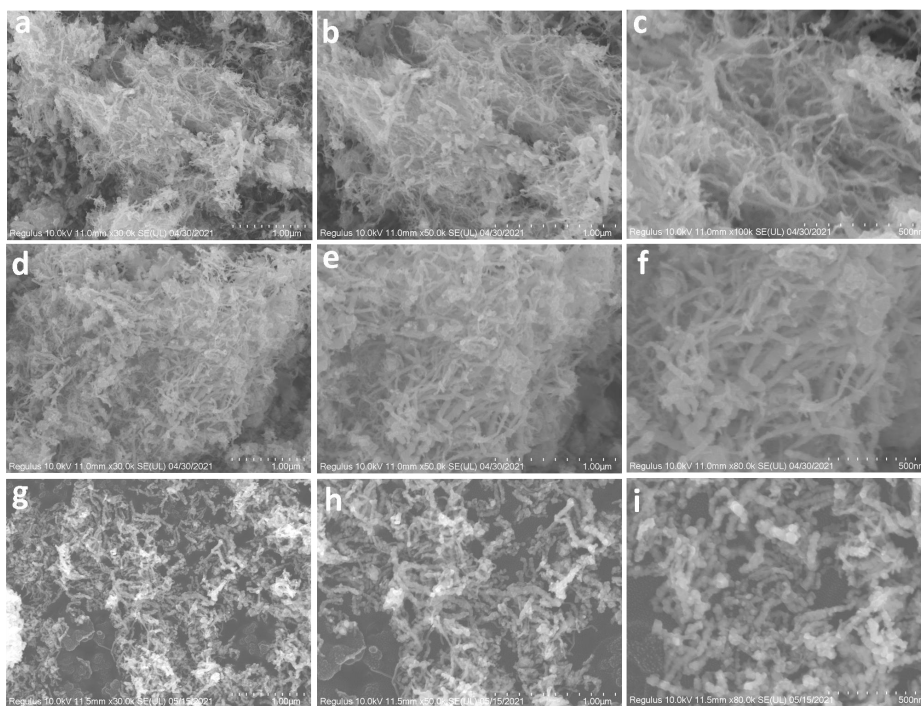

Figure S2. SEM images of PtCo<sub>3</sub> (a-c), PtFe<sub>3</sub> (d-f) and PtNi<sub>3</sub> NBs.

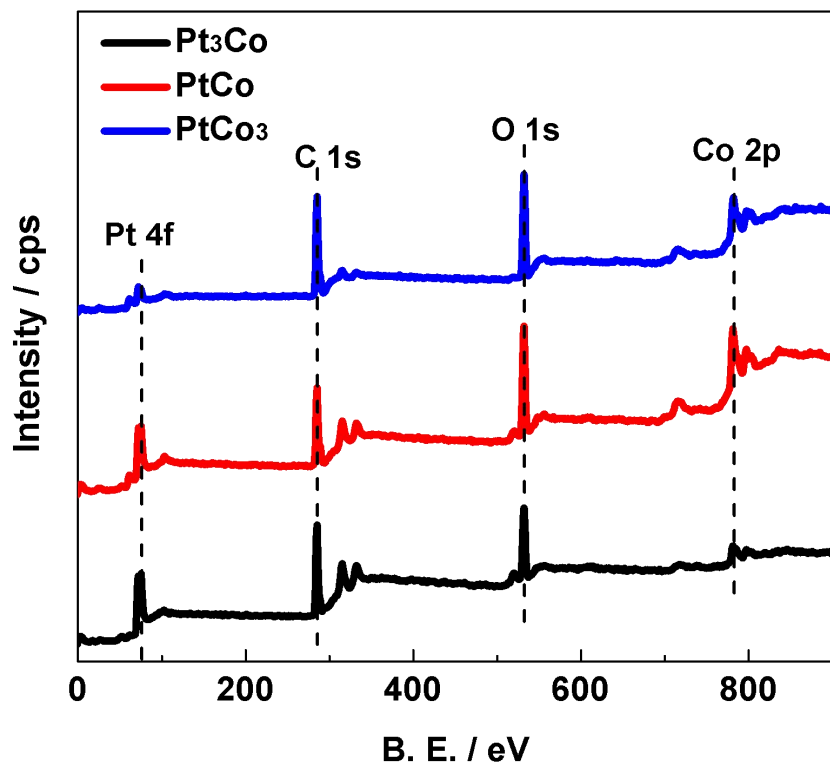

Figure S3. XPS survey spectra of PtCo NBs.

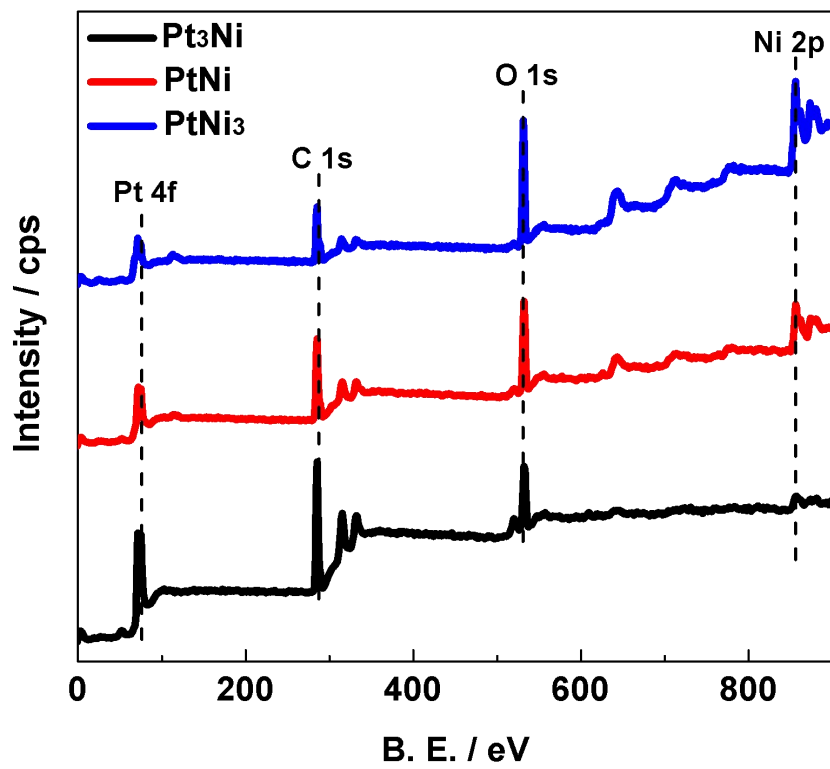

Figure S4. XPS survey spectra of PtNi NBs.

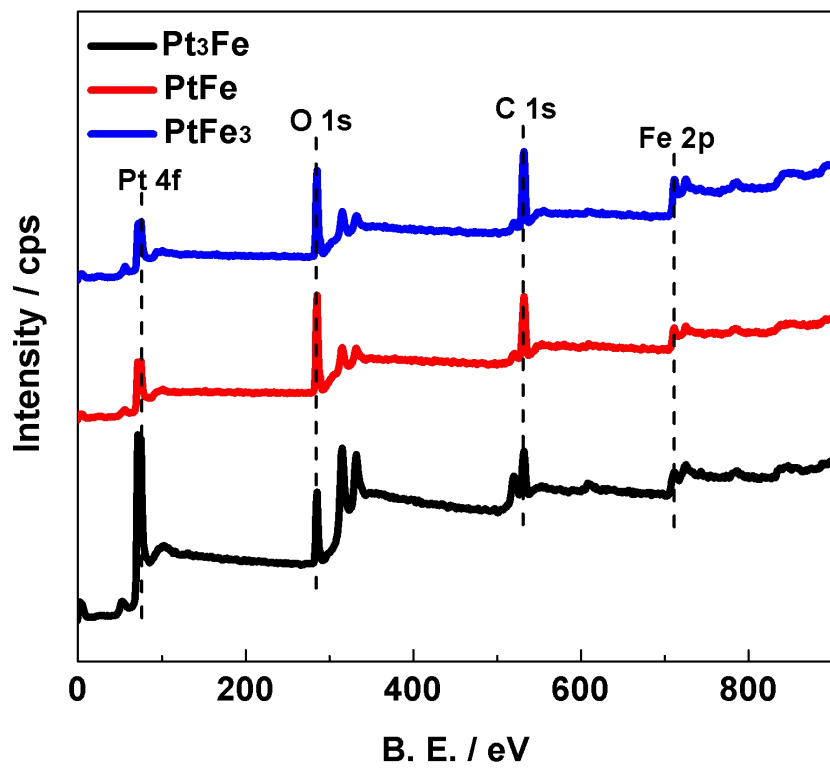

Figure S5. XPS survey spectra of PtFe NBs.



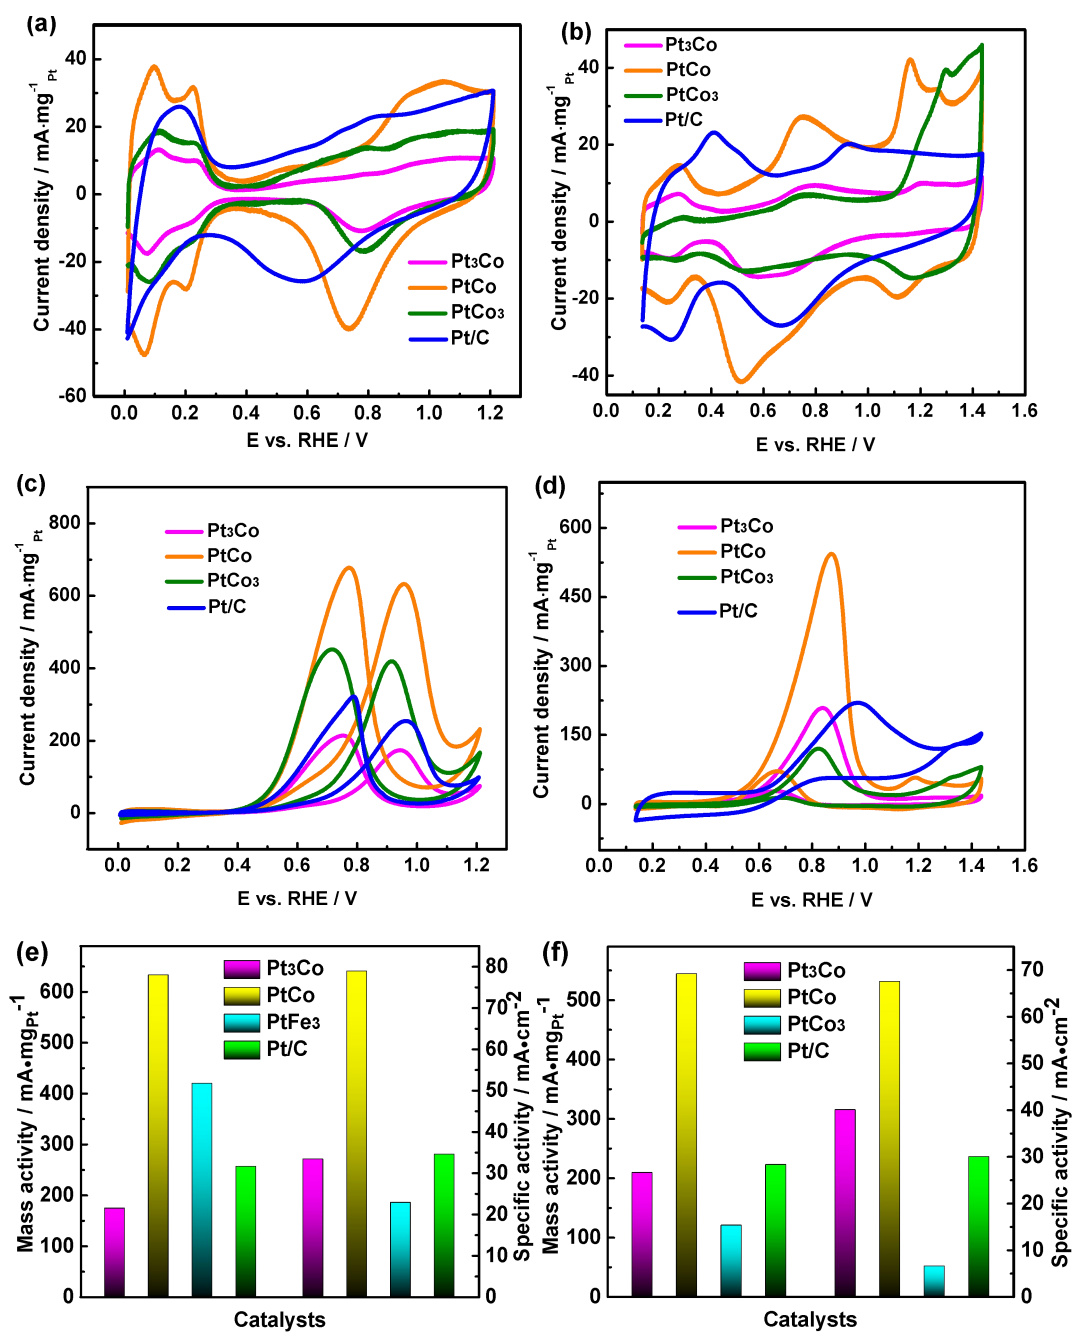

Figure S6. CVs of Pt-Co NBs in (a) 0.5 M H<sub>2</sub>SO<sub>4</sub>, (b) 0.5 M H<sub>2</sub>SO<sub>4</sub> + 1.0 M CH<sub>3</sub>OH, (c) 1.0 M KOH, and (d) 1.0 M KOH + 1.0 M CH<sub>3</sub>OH. Mass- and area-specific activities of Pt-Co NBs at 0.929 and 0.835 V (vs. RHE) in (e) 0.5 M H<sub>2</sub>SO<sub>4</sub> + 1.0 M CH<sub>3</sub>OH and (f) 1.0 M KOH + 1.0 M CH<sub>3</sub>OH, respectively.

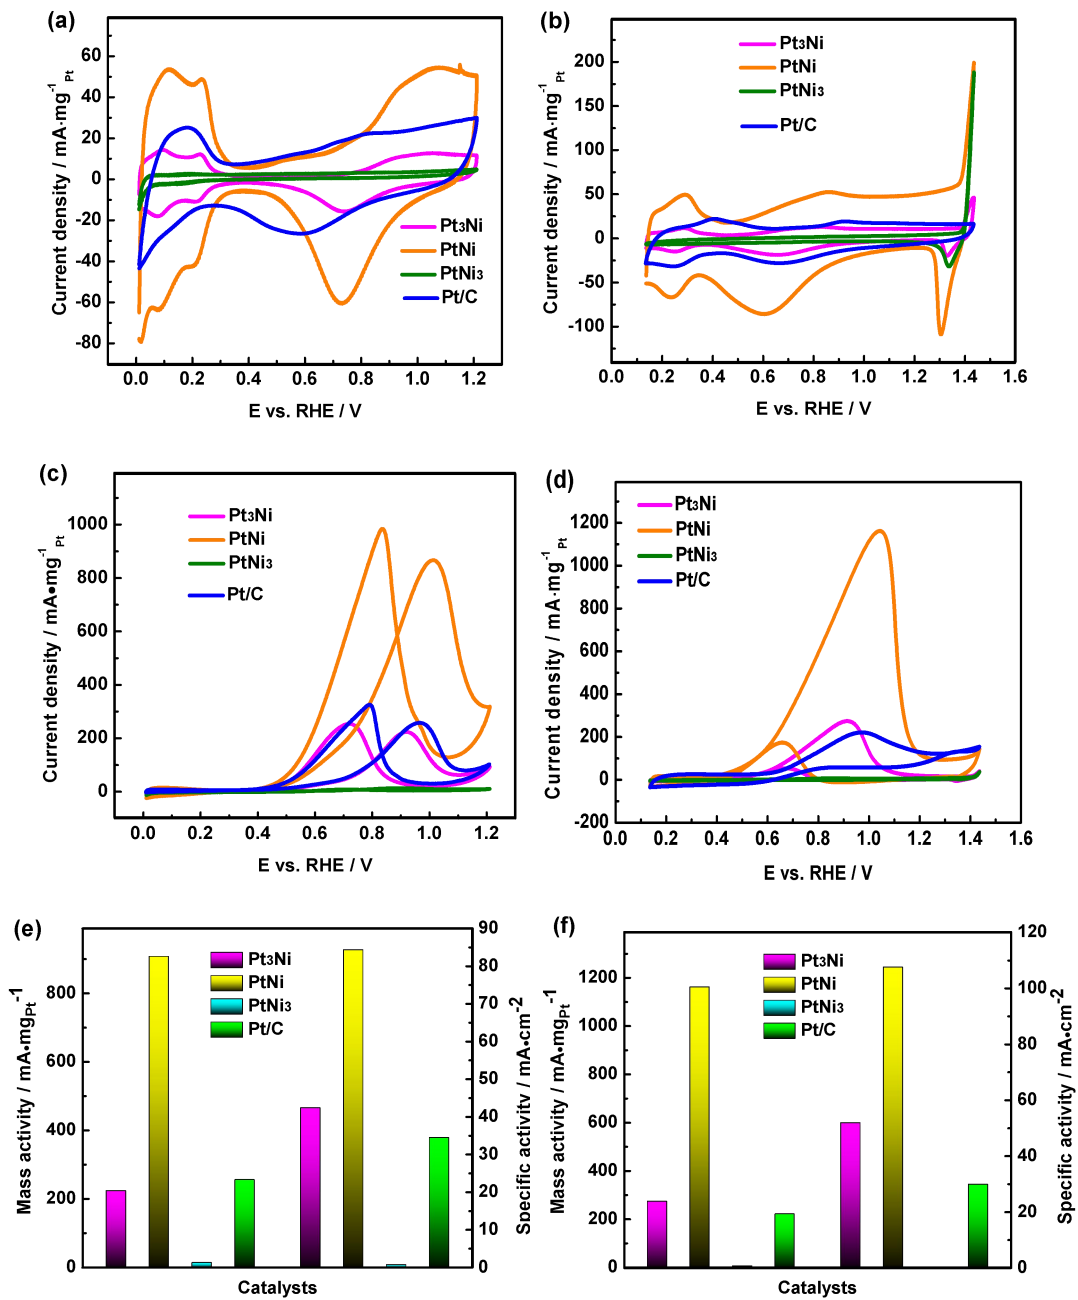

Figure S7. CVs of Pt-Ni NBs in (a) 0.5 M H<sub>2</sub>SO<sub>4</sub>, (b) 0.5 M H<sub>2</sub>SO<sub>4</sub> + 1.0 M CH<sub>3</sub>OH, (c) 1.0 M KOH, and (d) 1.0 M KOH + 1.0 M CH<sub>3</sub>OH. Mass- and area-specific activities of Pt-Ni NBs at 0.929 and 0.835 V (vs. RHE) in (e) 0.5 M H<sub>2</sub>SO<sub>4</sub> + 1.0 M CH<sub>3</sub>OH and (f) 1.0 M KOH + 1.0 M CH<sub>3</sub>OH, respectively.

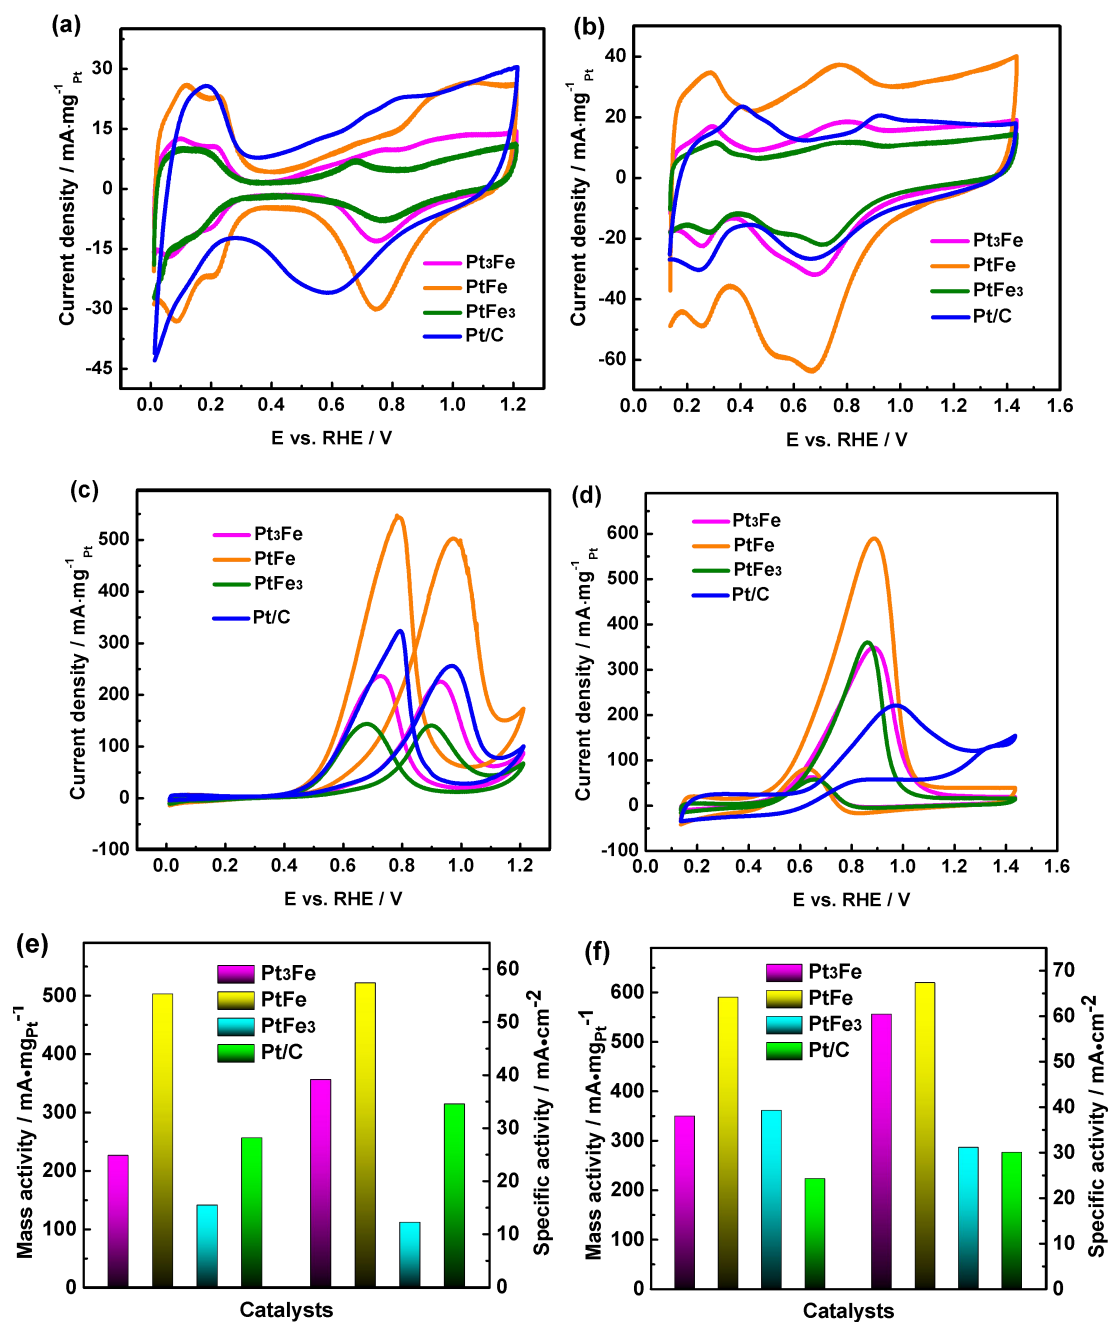

Figure S8. CVs of Pt-Fe NBs in (a) 0.5 M H<sub>2</sub>SO<sub>4</sub>, (b) 0.5 M H<sub>2</sub>SO<sub>4</sub> + 1.0 M CH<sub>3</sub>OH, (c) 1.0 M KOH, and (d) 1.0 M KOH + 1.0 M CH<sub>3</sub>OH. Mass- and area-specific activities of Pt-Fe NBs at 0.929 and 0.835 V (vs. RHE) in (e) 0.5 M H<sub>2</sub>SO<sub>4</sub> + 1.0 M CH<sub>3</sub>OH and (f) 1.0 M KOH + 1.0 M CH<sub>3</sub>OH, respectively.

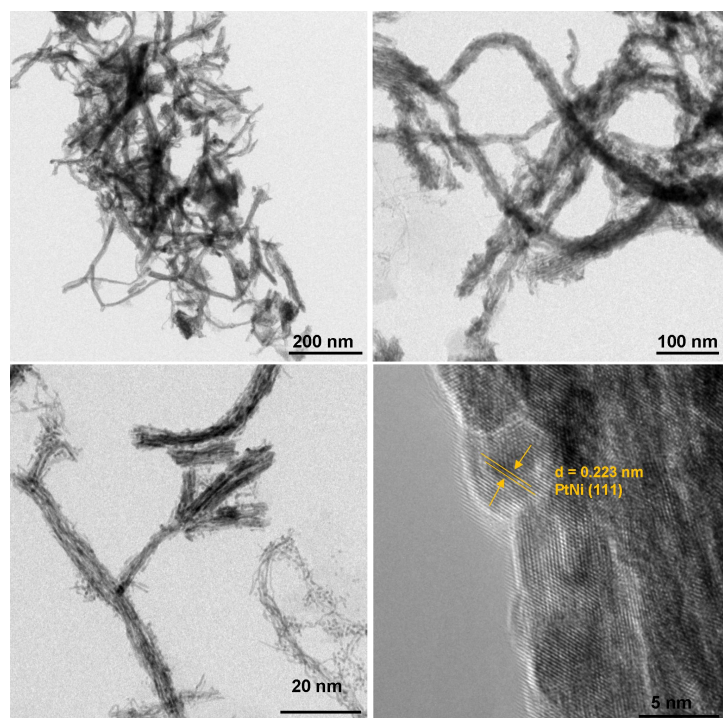

Figure S9. TEM and HRTEM images of PtNi NBs after 2000 cycles in 0.5 M H<sub>2</sub>SO<sub>4</sub> + 1.0 M CH<sub>3</sub>OH .
